# Supplementary material for: A New and Rapid HPLC Method to Determine the Degree of Deacetylation of Glutaraldehyde-Cross-Linked Chitosan
Source: MDPI journal article supplement (doi:10.3390/molecules28217294), 2023-10-27
Supplement: s1 [file s1]

# Supplementary materials

## A new and rapid HPLC method to determine the degree of deacetylation of glutaraldehyde-cross-linked chitosan

Ons Amamou<sup>1,2</sup>, Jean-Philippe Denis<sup>1</sup>, Élise Heinen<sup>1</sup>, Taoufik Boubaker<sup>2</sup>, and Sébastien Cardinal<sup>1,\*</sup>

<sup>1</sup> Département de Biologie, Chimie et Géographie, Université du Québec à Rimouski, Rimouski, QC G5L 3A1, Canada

<sup>2</sup> Laboratoire de Chimie Hétérocyclique, Produits Naturels et Réactivité (LR11S39), Faculté des Sciences, Université de Monastir, Monastir, Tunisia

\* Correspondence : sebastien\_cardinal@uqar.ca;

### Content

|                                                                                                           |    |
|-----------------------------------------------------------------------------------------------------------|----|
| 1. Determination of the degree of deacetylation and level of reticulation via potentiometric titration... | 2  |
| a) General principle.....                                                                                 | 2  |
| b) Determination of $DDA_{SM}$ —complete raw values.....                                                  | 2  |
| c) Determination of $DDA_{SM}$ (example).....                                                             | 3  |
| d) Determination of average molar mass of monomer.....                                                    | 4  |
| e) Determination of $DDA_{RET}$ and $LR_{TITR}$ —complete raw values .....                                | 5  |
| f) Determination of $DDA_{RET}$ (example).....                                                            | 6  |
| 2. Determination of the level of reticulation via potentiometric titration (example).....                 | 8  |
| 3. Preparation of a standard curve for $GLA(DNPH)_2$ .....                                                | 9  |
| 4. Determination of the level of reticulation by HPLC.....                                                | 11 |
| a) Equation treatment.....                                                                                | 11 |
| b) Detailed example.....                                                                                  | 13 |
| c) Complete data.....                                                                                     | 16 |
| d) Example of chromatogram.....                                                                           | 21 |
| 5. FTIR spectra of chitosan resins.....                                                                   | 22 |

## 1. Determination of the degree of deacetylation and level of reticulation via potentiometric titration

### a. General principle

The degree of deacetylation (DDA) was determined by pH metric titration for unmodified (DDA<sub>SM</sub>) and modified chitosan (DDA<sub>RET</sub>), using an automatic titrator (848 Titrino plus, Metrohm). In brief, chitosan is initially dissolved in HCl to protonate all the amine functionalities. Then, this solution is titrated with NaOH. The volume of sodium hydroxide used corresponds both to the volume necessary to neutralize the excess HCl acid used for dissolving the chitosan ( $V_1$ ) and to neutralize the total acidity of the medium ( $V_2$ ). The difference between  $V_2$  and  $V_1$  gives the quantity of NaOH necessary for the neutralization of the ammonium functions of the unmodified chitosan (Figure 1) and modified chitosan (Figure 2). The DDA was calculated following the equation given by Broussignac (ref. 21 of the main manuscript) [Equation (S1)]:

$$\text{DDA} = 100 \frac{203.19(V_2 - V_1)[\text{NaOH}]}{m + 42.03(V_2 - V_1)[\text{NaOH}]} \quad (\text{S1})$$

for which [NaOH] is the concentration (0.1 mol/L) of the sodium hydroxide solution used for titration, ( $V_2 - V_1$ ) is the volume of HCl required to neutralize the ammonium functionalities (L), 203.19 (g/mol) is the molecular weight of the N-acetyl-glucosamine unit, 42.033 (g/mol) is the difference between the molecular weight of N-acetyl-glucosamine unit and that of D-glucosamine unit, and  $m$  is the mass (g) of the sample in the dry state before titration.

In the case of the present study, titration was performed in triplicate for each chitosan starting material and the values were reported as means  $\pm$  standard deviations.

### b. Determination of DDA<sub>SM</sub>—complete raw values

**Table S1** Determination of DDA<sub>SM</sub> : complete raw values

| Entry | Starting material | Mass used for titration (g) | [NaOH] <sub>(aq)</sub> | $V_1$ (mL) | $V_2$ (mL) | DDA <sub>SM</sub> (%) as calculated with Eq (1) | DDA <sub>SM</sub> (%) Mean $\pm$ standard deviations |
|-------|-------------------|-----------------------------|------------------------|------------|------------|-------------------------------------------------|------------------------------------------------------|
| 1     | Chito-            | 0.0503                      | 0.1                    | 3.866      | 6.066      | 75.069                                          | 75.0 $\pm$ 0.2                                       |
| 2     | Clear®            | 0.0506                      | 0.1                    | 3.875      | 6.092      | 75.180                                          |                                                      |
| 3     | HQG 10            | 0.0496                      | 0.1                    | 3.925      | 6.084      | 74.765                                          |                                                      |
| 4     | Chito-            | 0.0496                      | 0.1                    | 3.844      | 6.073      | 76.804                                          | 77.5 $\pm$ 0.6                                       |
| 5     | Clear®            | 0.0502                      | 0.1                    | 3.878      | 6.175      | 77.977                                          |                                                      |
| 6     | HQG 400           | 0.0498                      | 0.1                    | 3.819      | 6.086      | 77.640                                          |                                                      |
| 7     | Chito-            | 0.0497                      | 0.1                    | 4.068      | 6.056      | 69.578                                          | 69.4 $\pm$ 0.1                                       |
| 8     | Clear®            | 0.0504                      | 0.1                    | 4.056      | 6.066      | 69.400                                          |                                                      |
| 9     | HQG 800           | 0.0503                      | 0.1                    | 4.053      | 6.056      | 69.311                                          |                                                      |

c. Determination of  $DDA_{SM}$  (example)

Figure S1 presents a titration curve for ChitoClear® HQG 400 (Table S1, Entry 4). Total titration time = 20 minutes.

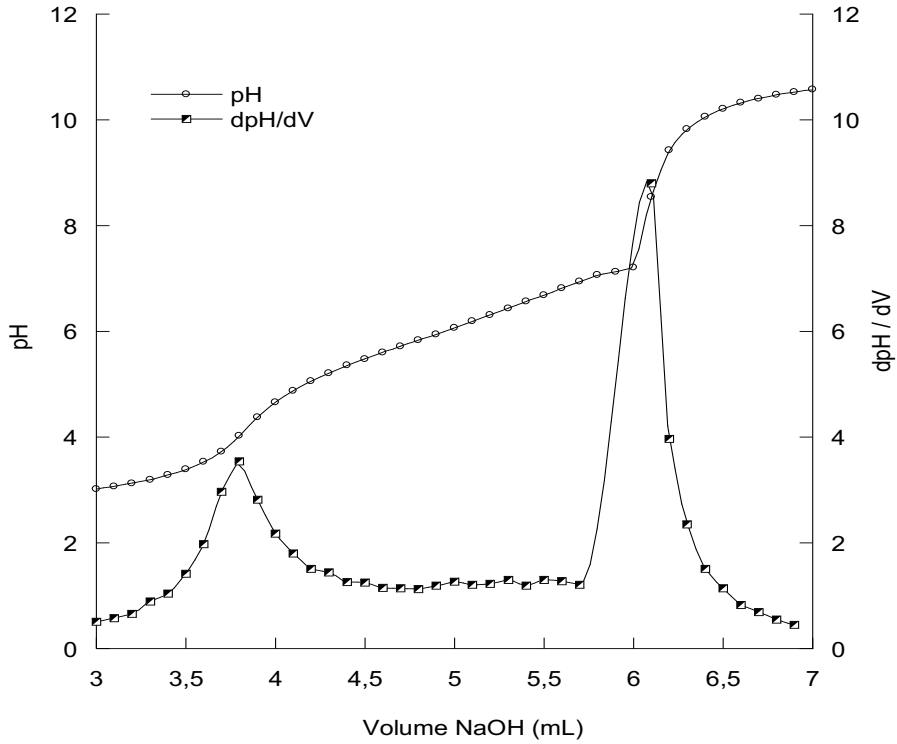

**Figure S1.** Potentiometric determination of DDA in starting material ChitoClear® HQG 400 (Table S1, Entry 4)

From this titration curve,  $V_1$  and  $V_2$  values were determined :  $V_1 = 3.844$  mL ;  $V_2 = 6.073$  mL.

From there, Equation (S1) was then used to determine DDA value

$$\begin{aligned}
 DDA_{SM} &= 100 \frac{203.19(V_2 - V_1)[NaOH]}{m + 42.03(V_2 - V_1)[NaOH]} \\
 &= 100 \frac{203.19 \text{ g} \cdot \text{mol}^{-1} \cdot (6.073 \cdot 10^{-3} \text{ L} - 3.844 \cdot 10^{-3} \text{ L}) \cdot 0.1 \text{ mol} \cdot \text{L}^{-1}}{0.0496 \text{ g} + 42.033 \text{ g} \cdot \text{mol}^{-1} \cdot (6.073 \cdot 10^{-3} \text{ L} - 3.844 \cdot 10^{-3} \text{ L}) \cdot 0.1 \text{ mol} \cdot \text{L}^{-1}} \\
 &= 76.805
 \end{aligned}$$

d. Determination of average molar mass of monomer

Once  $DDA_{SM}$  has been established, the average molar mass of a monomer unit ( $M_{av\_mono}$ ) can be determined for each starting material, using Equation (S2):

$$M_{av\_mono} = \frac{DDA_{SM}}{100} \cdot M_{glucosamine} + \frac{(100-DDA_{SM})}{100} M_{N-acetylglucosamine} \quad (S2)$$

for which  $DDA_{SM}$  is the degree of deacetylation of the chitosan starting material,  $M_{glucosamine}$  is the molar mass of a glucosamine monomer unit (161.16 g/mol) and  $M_{N-acetylglucosamine}$  is the molar mass of a N-acetylglucosamine monomer unit (203.19 g/mol).

For example, for ChitoClear® HQG 10,  $DDA_{SM} = 75.0 \pm 0.2$   
Consequently, when applying Equation (2), we obtained

$$M_{av\_mono} = \frac{75}{100} \cdot 161.16 \text{ g} \cdot \text{mol}^{-1} + \frac{(100 - 75)}{100} 203.19 \text{ g} \cdot \text{mol}^{-1} = 171.67 \text{ g} \cdot \text{mol}^{-1}$$

Uncertainties on this value was calculated using a variant of the upper-lower bound method of uncertainty propagation. In this case, since the two ratios of the monomer must equal 1, we used  $DDA_{SM} = 75.0 - 0.2$  for determining  $M_{av\_mono\_Max}$  and  $DDA_{SM} = 75.0 + 0.2$  for determining  $M_{av\_mono\_Min}$ .

$$M_{av\_mono\_Max} = \frac{75 - 0.2}{100} \cdot 161.16 \text{ g} \cdot \text{mol}^{-1} + \frac{(100 - (75 - 0.2))}{100} 203.19 \text{ g} \cdot \text{mol}^{-1} = 171.75 \text{ g} \cdot \text{mol}^{-1}$$

$$M_{av\_mono\_Min} - M_{av\_mono} = 171.75 - 171.67 = 0.08$$

$$M_{av\_mono\_Min} = \frac{75 + 0.2}{100} \cdot 161.16 \text{ g} \cdot \text{mol}^{-1} + \frac{(100 - (75 + 0.2))}{100} 203.19 \text{ g} \cdot \text{mol}^{-1} = 171.58 \text{ g} \cdot \text{mol}^{-1}$$

$$M_{av\_mono} - M_{av\_mono\_Min} = 171.67 - 171.58 = 0.08$$

Thus, for ChitoClear® HQG 10, final value of  $M_{av\_mono}$  was reported as:

$$M_{av\_mono} = 171.67 \pm 0.08 \text{ g} \cdot \text{mol}^{-1}$$

Table S2 shows the average molar masses of monomer units ( $M_{av\_mono}$ ) that were calculated for each starting material, using the approach described above.

**Table S2** Values calculated for  $M_{av\_mono}$  for chitosan starting materials.

| Entry | Starting material   | $DDA_{SM}$ (%) | $M_{av\_mono}$ (g/mol) |
|-------|---------------------|----------------|------------------------|
| 1     | ChitoClear® HQG 10  | $75.0 \pm 0.2$ | $171.67 \pm 0.08$      |
| 2     | ChitoClear® HQG 400 | $77.5 \pm 0.6$ | $170.6 \pm 0.3$        |
| 3     | ChitoClear® HQG 800 | $69.4 \pm 0.1$ | $174.02 \pm 0.04$      |

e. Determination of  $DDA_{RET}$  and  $LR_{TITR}$ —complete raw values

**Table S3** Determination of  $DDA_{RET}$  for ChitoClear® HQG 10: complete raw values.

| Entry | GLA/NH <sub>2</sub> ratio | Mass used for titration (g) | [NaOH] <sub>(aq)</sub> | V <sub>1</sub> | V <sub>2</sub> | $DDA_{RET}$ (%) as calculated with Eq (1) | $DDA_{RET}$ (%) Mean± standard deviations | $LR_{TITR}$ (%) |
|-------|---------------------------|-----------------------------|------------------------|----------------|----------------|-------------------------------------------|-------------------------------------------|-----------------|
| 1     | 1 : 4                     | 0.0500                      | 0.1                    | 4.375          | 6.049          | 59.636                                    | 59.4 ± 0.3                                | 20.8 ± 0.7      |
| 2     |                           | 0.0500                      | 0.1                    | 4.368          | 6.040          | 59.573                                    |                                           |                 |
| 3     |                           | 0.0504                      | 0.1                    | 4.381          | 6.052          | 59.127                                    |                                           |                 |
| 4     | 1 : 2                     | 0.0502                      | 0.1                    | 4.592          | 6.005          | 51.142                                    | 50.5 ± 0.6                                | 33 ± 1          |
| 5     |                           | 0.0503                      | 0.1                    | 4.564          | 5.950          | 50.177                                    |                                           |                 |
| 6     |                           | 0.0510                      | 0.1                    | 4.573          | 5.978          | 50.168                                    |                                           |                 |
| 7     | 1 : 1                     | 0.0505                      | 0.1                    | 4.833          | 5.911          | 39.803                                    | 36 ± 3                                    | 52 ± 4          |
| 8     |                           | 0.0510                      | 0.1                    | 5.044          | 5.957          | 33.829                                    |                                           |                 |
| 9     |                           | 0.0504                      | 0.1                    | 5.009          | 5.943          | 34.934                                    |                                           |                 |
| 10    | 2 : 1                     | 0.0503                      | 0.1                    | 5.097          | 5.964          | 32.657                                    | 32.1 ± 0.9                                | 57 ± 2          |
| 11    |                           | 0.0504                      | 0.1                    | 5.083          | 5.939          | 32.211                                    |                                           |                 |
| 12    |                           | 0.0504                      | 0.1                    | 5.121          | 5.942          | 30.978                                    |                                           |                 |
| 13    | 4 : 1                     | 0.0498                      | 0.1                    | 5.442          | 5.959          | 20.212                                    | 22 ± 3                                    | 71 ± 4          |
| 14    |                           | 0.0505                      | 0.1                    | 5.423          | 5.939          | 19.907                                    |                                           |                 |
| 15    |                           | 0.0502                      | 0.1                    | 5.290          | 5.938          | 24.879                                    |                                           |                 |

**Table S4** Determination of  $DDA_{RET}$  for ChitoClear® HQG 400: complete raw values.

| Entry | GLA: NH <sub>2</sub> ratio | Mass used for titration (g) | [NaOH] <sub>(aq)</sub> | V <sub>1</sub> | V <sub>2</sub> | $DDA_{RET}$ (%) as calculated with Eq (1) | $DDA_{RET}$ (%) Mean± standard deviations | $LR_{TITR}$ (%) |
|-------|----------------------------|-----------------------------|------------------------|----------------|----------------|-------------------------------------------|-------------------------------------------|-----------------|
| 1     | 1 : 4                      | 0.0506                      | 0.1                    | 4.272          | 5.978          | 60.003                                    | 59.5 ± 0.7                                | 23 ± 2          |
| 2     |                            | 0.0500                      | 0.1                    | 4.306          | 5.950          | 58.697                                    |                                           |                 |
| 3     |                            | 0.0504                      | 0.1                    | 4.260          | 5.950          | 59.716                                    |                                           |                 |
| 4     | 1 : 2                      | 0.0500                      | 0.1                    | 4.692          | 5.918          | 45.167                                    | 43 ± 2                                    | 45 ± 4          |
| 5     |                            | 0.0499                      | 0.1                    | 4.626          | 5.760          | 42.150                                    |                                           |                 |
| 6     |                            | 0.0503                      | 0.1                    | 4.755          | 5.898          | 42.147                                    |                                           |                 |
| 7     | 1 : 1                      | 0.0503                      | 0.1                    | 5.100          | 5.832          | 27.865                                    | 28.0 ± 0.3                                | 64 ± 2          |
| 8     |                            | 0.0508                      | 0.1                    | 5.105          | 5.840          | 27.713                                    |                                           |                 |
| 9     |                            | 0.0502                      | 0.1                    | 5.088          | 5.831          | 28.312                                    |                                           |                 |
| 10    | 2 : 1                      | 0.0502                      | 0.1                    | 5.166          | 5.833          | 25.570                                    | 23 ± 3                                    | 70 ± 5          |
| 11    |                            | 0.0497                      | 0.1                    | 5.148          | 5.646          | 19.537                                    |                                           |                 |
| 12    |                            | 0.0499                      | 0.1                    | 5.180          | 5.768          | 22.813                                    |                                           |                 |
| 13    | 4 : 1                      | 0.0503                      | 0.1                    | 5.191          | 5.726          | 20.687                                    | 18 ± 3                                    | 77 ± 5          |
| 14    |                            | 0.0504                      | 0.1                    | 5.122          | 5.574          | 17.561                                    |                                           |                 |
| 15    |                            | 0.0502                      | 0.1                    | 5.202          | 5.598          | 15.514                                    |                                           |                 |

**Table S5** Determination of  $DDA_{RET}$  for ChitoClear® HQG 800: complete raw values.

| Entry | GLA/NH <sub>2</sub> ratio | Mass used for titration (g) | [NaOH] <sub>(aq)</sub> | V <sub>1</sub> | V <sub>2</sub> | $DDA_{RET}$ (%) as calculated with Eq (1) | $DDA_{RET}$ (%) Mean $\pm$ standard deviations | LR <sub>TITR</sub> (%) |
|-------|---------------------------|-----------------------------|------------------------|----------------|----------------|-------------------------------------------|------------------------------------------------|------------------------|
| 2     |                           | 0.0494                      | 0.1                    | 4.616          | 5.861          | 46.304                                    | 48 $\pm$ 2                                     | 31 $\pm$ 3             |
| 3     |                           | 0.0502                      | 0.1                    | 4.570          | 5.942          | 49.811                                    |                                                |                        |
| 4     | 1 : 2                     | 0.0500                      | 0.1                    | 4.820          | 5.827          | 37.729                                    | 37 $\pm$ 3                                     | 47 $\pm$ 4             |
| 5     |                           | 0.0500                      | 0.1                    | 4.790          | 5.855          | 39.723                                    |                                                |                        |
| 6     |                           | 0.0503                      | 0.1                    | 4.850          | 5.751          | 33.848                                    |                                                |                        |
| 7     | 1 : 1                     | 0.0493                      | 0.1                    | 5.170          | 5.767          | 23.414                                    | 23.2 $\pm$ 0.2                                 | 67 $\pm$ 1             |
| 8     |                           | 0.0499                      | 0.1                    | 5.147          | 5.749          | 23.330                                    |                                                |                        |
| 9     |                           | 0.0500                      | 0.1                    | 5.170          | 5.766          | 23.065                                    |                                                |                        |
| 10    | 2 : 1                     | 0.0496                      | 0.1                    | 5.250          | 5.747          | 19.537                                    | 19.5 $\pm$ 0.6                                 | 72 $\pm$ 1             |
| 11    |                           | 0.0502                      | 0.1                    | 5.250          | 5.770          | 20.169                                    |                                                |                        |
| 12    |                           | 0.0497                      | 0.1                    | 5.350          | 5.831          | 18.896                                    |                                                |                        |
| 13    | 4 : 1                     | 0.0498                      | 0.1                    | 5.350          | 5.831          | 18.860                                    | 18.87 $\pm$ 0.02                               | 72.8 $\pm$ 0.3         |
| 14    |                           | 0.0497                      | 0.1                    | 5.350          | 5.831          | 18.896                                    |                                                |                        |
| 15    |                           | 0.0498                      | 0.1                    | 5.350          | 5.831          | 18.860                                    |                                                |                        |

*f. Determination of  $DDA_{RET}$  (example)*

Figure S2 shows a titration curve for reticulated ChitoClear® HQG 400 (Table S4, Entry1). Total titration time = 20 h.

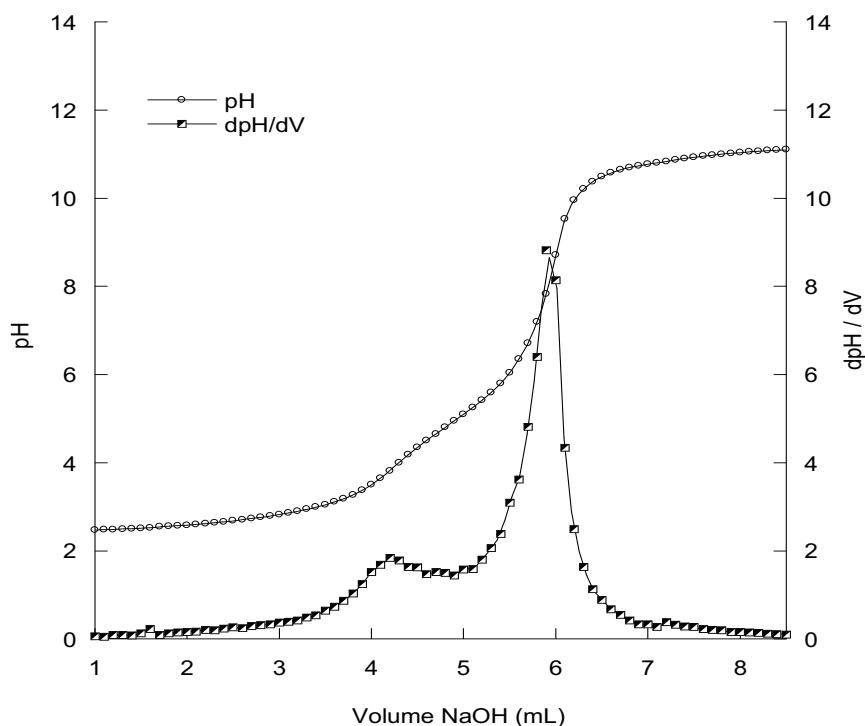

**Figure S2.** Potentiometric determination of  $DDA$  for cross-linked (GLA/NH<sub>2</sub> 1:4) chitosan ChitoClear® HQG 400 (Table S4, Entry1)

From this titration curve,  $V_1$  and  $V_2$  values were determined:  $V_1 = 4.272$  mL ;  $V_2 = 5.978$  mL.

From there, Equation (S1) was then used to determine the degree of deacetylation.

$$\begin{aligned}
 DDA_{RET} &= 100 \frac{203.19(V_2-V_1)[NaOH]}{m+42.03(V_2-V_1)[NaOH]} \quad (S1) \\
 &= 100 \frac{203.19 \text{ g} \cdot \text{mol}^{-1} \cdot (5.978 \cdot 10^{-3} \text{ L} - 4.272 \cdot 10^{-3} \text{ L}) \cdot 0.1 \text{ mol} \cdot \text{L}^{-1}}{0.0506 \text{ g} + 42.033 \text{ g} \cdot \text{mol}^{-1} \cdot (5.978 \cdot 10^{-3} \text{ L} - 4.272 \cdot 10^{-3} \text{ L}) \cdot 0.1 \text{ mol} \cdot \text{L}^{-1}} \\
 &= 60.003
 \end{aligned}$$

## 2. Determination of the level of reticulation via potentiometric titration (example)

Level of reticulation determined by titration ( $LR_{TITR}$ ) is defined by Equation (S3):

$$LR_{TITR} = 100 \frac{DDA_{SM} - DDA_{RET}}{DDA_{SM}} \quad (S3)$$

for which  $DDA_{SM}$  is the degree of deacetylation of chitosan starting material,  $DDA_{RET}$  is the degree of deacetylation of reticulated chitosan as determined by titration.

For example, for ChitoClear® HQG 800 / GLA/ $NH_2$  1:4 :

$DDA_{RET} = 48 \pm 2$  (Table S5, Entries 1-3) :

$DDA_{SM} = 69.4 \pm 0.1$  (Table S1 Entries 7-9)

$$LR_{TITR} = 100 \frac{69.4 - 48}{69.4} = 30.84$$

Uncertainties on those values were calculated using the upper-lower bound method of uncertainty propagation.

$$LR_{TITR\_Max} = 100 \frac{(69.4+0.1) - (48-2)}{(69.4-0.1)} = 33.91$$

$$LR_{TITR\_Max} - LR_{TITR} = 33.91 - 30.84 = 3.07$$

$$LR_{TITR\_Min} = 100 \frac{(69.4-0.1) - (48+2)}{(69.4+0.1)} = 27.76$$

$$LR_{TITR} - LR_{TITR\_Min} = 30.84 - 27.76 = 3.08$$

This gives a final level of reticulation determined by titration of:

$$LR_{TITR} = 31 \pm 3$$



### 3. Preparation of a standard curve for GLA(DNPH)<sub>2</sub>

Figure S3 shows a typical chromatogram obtain for a GLA(DNPH)<sub>2</sub> standard.

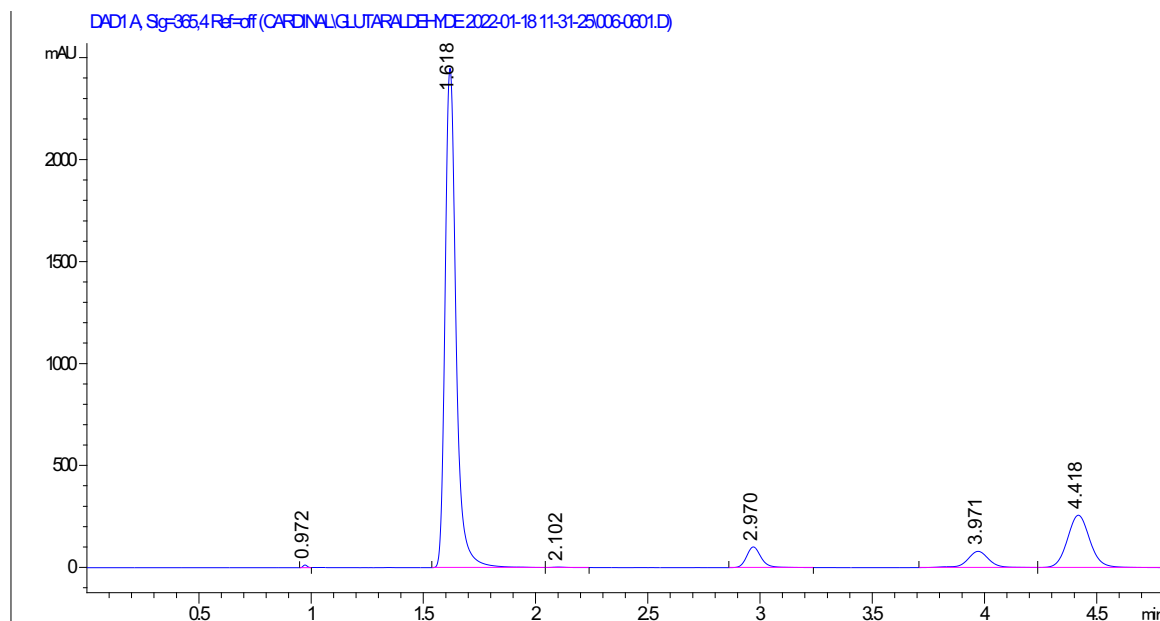

**Figure S3.** Chromatogram for a standard of GLA(DNPH)<sub>2</sub> (Table S6, Entry 5). Peaks at 3.971 min and 4.418 min correspond to GLA(DNPH)<sub>2</sub>. Peak at 1.618 min is attributed to unreacted excess DNPH. Peak at 2.970 min corresponds to an impurity that was found in the DNPH reagent. Total run time = 5 min.

A total of six standards with concentrations ranging from  $1.4 \times 10^{-5}$  to  $5.6 \times 10^{-4}$  mol/L were used to build the calibration curve. Table S6 and Figure S4 (next page) show a complete calibration curve.

**Table S6** Retention time and peak area for various GLA(NDNPH)<sub>2</sub> standards

| Entry | Concentration (mol/L) | Peaks retention time (min) | Peak Area | Ratio between peak area | Sum of Areas |
|-------|-----------------------|----------------------------|-----------|-------------------------|--------------|
| 1     | 1.4 10 <sup>-5</sup>  | 3.954                      | 48        | 3,5                     | 216.4        |
|       |                       | 4.399                      | 168.4     |                         |              |
| 2     | 2.8 10 <sup>-5</sup>  | 4.002                      | 97.2      | 3,4                     | 427.0        |
|       |                       | 4.455                      | 329.8     |                         |              |
| 3     | 4.2 10 <sup>-5</sup>  | 4.009                      | 150.6     | 3,4                     | 660.7        |
|       |                       | 4.465                      | 510.1     |                         |              |
| 4     | 8.4 10 <sup>-5</sup>  | 4.014                      | 319.6     | 3,4                     | 1392.5       |
|       |                       | 4.471                      | 1072.9    |                         |              |
| 5     | 1.4 10 <sup>-4</sup>  | 3.971                      | 530.1     | 3,4                     | 2306.9       |
|       |                       | 4.418                      | 1776.8    |                         |              |
| 6     | 5.6 10 <sup>-4</sup>  | 4.022                      | 2174.4    | 3,3                     | 9439.0       |
|       |                       | 4.481                      | 7264.6    |                         |              |

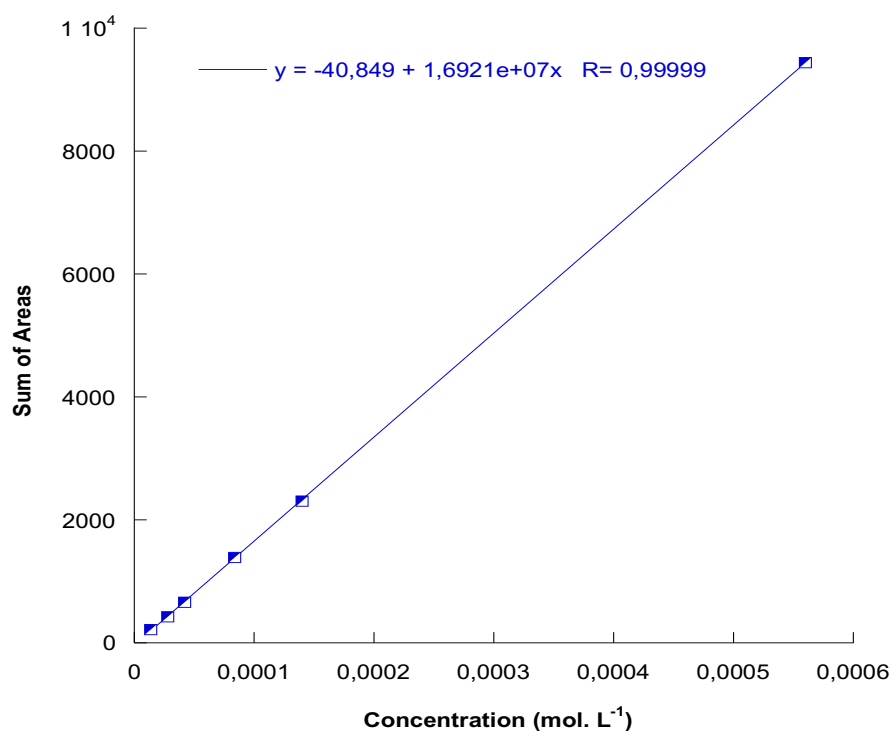**Figure S4.** Calibration curve for GLA(NDNPH)<sub>2</sub>

#### 4. Determination of the level of reticulation by HPLC

##### a. Equation treatment

The level of reticulation determined by HPLC ( $LR_{HPLC}$ ) is defined by Equation (S4):

$$LR_{HPLC} = 100 \frac{n(NH_2_{reacted})}{n(NH_2_{SM})} \quad (S4)$$

for which  $n(NH_2_{reacted})$  is the quantity (mol) of free amino groups of the starting material that were involved in the cross-linking reaction and  $n(NH_2_{SM})$  is the quantity (mol) of free amino groups available in the sample of the starting material before the cross-linking reaction.

Considering the traditional theoretical representation of glutaraldehyde cross-linked chitosan, in which there is a 2:1 ratio between  $NH_2$  and GLA (see Figure 1 of the main manuscript), the term  $n(NH_2_{reacted})$ , can be developed as illustrated by Equation (S5):

$$LR_{HPLC} = 100 \frac{\frac{n(GLA_{cons})}{2}}{n(NH_2_{SM})} \quad (S5)$$

for which  $n(GLA_{cons})$  is the quantity (mol) of glutaraldehyde consumed during the reticulation reaction.

Considering that  $n(GLA_{cons})$  is the difference between the initial quantity of glutaraldehyde added to the reaction mixture and the residual quantity after the reaction,  $n(GLA_{cons})$  can be developed further as illustrated by Equation (S6):

$$LR_{HPLC} = \left(\frac{100}{2}\right) \frac{n(GLA_{added}) - n(GLA_{res})}{n(NH_2_{SM})} \quad (S6)$$

for which  $n(GLA_{added})$  is the initial quantity of glutaraldehyde added to reaction mixture (mol) and  $n(GLA_{res})$  is the residual quantity remaining in the reaction medium after cross-linking.

As described in Section 3.5.3, our HPLC methodology allows us to determine  $[GLA_{res\_HPLC}]$  (mol/L). This value is related to  $n(GLA_{res})$  by Equation S7:

$$n(GLA_{res}) = [GLA_{res\_HPLC}] \cdot DF \cdot V_{rxn} \quad (S7)$$

for which  $V_{rxn}$  is the total volume of the reticulation reaction medium (L) and DF is the dilution factor between the crude reaction medium and the sample analyzed with HPLC.

Merging Equation (S6) with Equation (S7) yields Equation (S8):

$$LR_{HPLC} = \left(\frac{100}{2}\right) \frac{n(GLA_{added}) - \{[GLA_{res\_HPLC}] \cdot DF \cdot V_{rxn}\}}{n(NH_{2\_SM})} \quad (S8)$$

The term  $n(NH_{2\_SM})$  can be defined by Equation (S9):

$$n(NH_{2\_SM}) = n(monomer) \frac{DDA_{SM}}{100} \quad (S9)$$

in which  $n(monomer)$  is the total amount of monomer (mol) in the chitosan starting material sample submitted to cross-linking, and  $DDA_{SM}$  is the degree of deacetylation of that same starting material.

Merging Equation (S8) with Equation (S9) yields Equation (S10):

$$LR_{HPLC} = \left(\frac{100}{2}\right) \frac{n(GLA_{added}) - \{[GLA_{res\_HPLC}] \cdot DF \cdot V_{rxn}\}}{n(monomer) \frac{DDA_{SM}}{100}} \quad (S10)$$

The term  $n(\text{monomer})$  can be developed using Equation (S11):

$$n(\text{monomer}) = \frac{m(\text{sample})}{M_{av\_mono}} \quad (\text{S11})$$

in which  $m(\text{sample})$  is the mass of chitosan starting material submitted to the reticulation reaction (g) and  $M_{av\_mono}$  is the average molar mass of the monomer of that same starting material (g/mol).<sup>1</sup>

Finally, by merging Equation (S10) and (S11), we obtain Equation (S12) that can be directly used to determine  $LR_{HPLC}$  from our HPLC traces:

$$LR_{HPLC} = \left(\frac{100}{2}\right) \frac{n(GLA_{added}) - \{[GLA_{res\ HPLC}] \cdot DF \cdot V_{reaction}\}}{\left[\frac{m(\text{sample})}{M_{av\_mono}}\right] \frac{DDA_{SM}}{100}} \quad (\text{S12})$$

#### *b. Detailed example*

As an example, we will calculate  $LR_{HPLC}$  for ChitoClear® HQG 800 / GLA/NH<sub>2</sub> 1:4 (see Table S9, Entry 1 for complete experimental data).

When using the values from Table S9 for Equation (S12), we obtain

$$LR_{HPLC} = \left(\frac{100}{2}\right) \frac{0.0031\ mol - \{4.894 \cdot 10^{-5}\ mol \cdot L^{-1} \cdot 2.5 \cdot 0.04\ L\}}{\left[\frac{2.039\ g}{M_{av\_mono}}\right] \frac{DDA_{SM}}{100}}$$

---

<sup>1</sup> The average molar mass of monomer ( $M_{av\_mono}$ ) has been extensively described in Section 1d of this document,. This section also presents the the average molar masses of the monomer units for all three chitosan starting materials.

It has been established that, for ChitoClear® HQG 800:

$$DDA_{SM} = 69.4 \pm 0.1 \quad (\text{see Table S1})$$

$$M_{av\_mono} = 174,02 \pm 0.04 \text{ g/mol} \quad (\text{see Table S2})$$

Consequently,

$$LR_{HPLC} = \left(\frac{100}{2}\right) \frac{0.0031 \text{ mol} - \{4.894 \cdot 10^{-5} \text{ mol} \cdot L^{-1} \cdot 2.5 \cdot 0.04 L\}}{\left[\frac{2.039 \text{ g}}{174.02 \text{ g} \cdot \text{mol}^{-1}}\right] \frac{69.4}{100}} = 19.031$$

Uncertainties in the  $LR_{HPLC}$  values were calculated considering the uncertainties on  $DDA_{SM}$  and  $M_{av\_mono}$  using the upper-lower bound method of uncertainty propagation.

For our example above, this gives us:

$$LR_{HPLC\_Min} = \left(\frac{100}{2}\right) \frac{0.0031 \text{ mol} - \{4.894 \cdot 10^{-5} \text{ mol} \cdot L^{-1} \cdot 2.5 \cdot 0.04 L\}}{\left[\frac{2.039 \text{ g}}{(174.02 - 0.04) \text{ g} \cdot \text{mol}^{-1}}\right] \frac{(69.4 - 0.1)}{100}} = 18.999$$

$$LR_{HPLC\_Max} = \left(\frac{100}{2}\right) \frac{0.0031 \text{ mol} - \{4.894 \cdot 10^{-5} \text{ mol} \cdot L^{-1} \cdot 2.5 \cdot 0.04 L\}}{\left[\frac{2.039 \text{ g}}{(174.02 + 0.04) \text{ g} \cdot \text{mol}^{-1}}\right] \frac{(69.4 + 0.1)}{100}} = 19.063$$

Thus for this sample, the definitive value for  $LR_{HPLC}$  is

$$LR_{HPLC} = 19.03 \pm 0.03$$

To calculate the  $LR_{HPLC}$  for the whole triplicate, we calculated the mean. Uncertainties were obtained by considering the maximum and minimum values for each term and calculating the standard deviation.

For example, for ChitoClear® HQG 800 / GLA/NH<sub>2</sub> 1:4 (Table S9, Entry 1,2 and 3)

$LR_{HPLC} = 19.03 \pm 0.03$  (Table S9, Entry 1)

$LR_{HPLC} = 18.55 \pm 0.03$  (Table S9, Entry 2)

$LR_{HPLC} = 19.22 \pm 0.03$  (Table S9, Entry 3)

$$\mu = \frac{19.03 + 18.55 + 19.22}{3} = 18.93$$

$$\sigma = \sqrt{\frac{(18.93 - 19.03)^2 + (18.93 - 19.00)^2 + (18.93 - 19.06)^2 + (18.93 - 18.55)^2 + (18.93 - 18.52)^2 + (18.93 - 18.58)^2 + (18.93 - 19.22)^2 + (18.93 - 19.19)^2 + (18.93 - 19.25)^2}{9}} = 0.3$$

Thus, for ChitoClear® HQG 800 / GLA/NH<sub>2</sub> 1:4 the final value of  $LR_{HPLC}$  reported in Table 3 of the manuscript is :

$LR_{HPLC} = 18.9 \pm 0.3$  (see Table S9)

c. Comple data

**Table S7** HPLC analysis and determination of LR<sub>HPLC</sub> for reticulated derivatives of ChitoClear® HQG 10

| Entry | GLA : NH <sub>2</sub><br>ratio | Peak<br>retention<br>time (min) | Peak<br>area | Area Ra-<br>tio* | Sum of<br>areas | m(sample)<br>(g) | [GLA <sub>res_HPLC</sub> ]<br>(mol/L) | DF   | n(GLA <sub>added</sub> )<br>(mol) | LR <sub>HPLC</sub> (%) | LR <sub>HPLC</sub> (%)<br>Mean of triplicate |
|-------|--------------------------------|---------------------------------|--------------|------------------|-----------------|------------------|---------------------------------------|------|-----------------------------------|------------------------|----------------------------------------------|
| 1     | 1 : 4                          | 4.040                           | 185.7        | 2.7              | 688.1           | 2.0527           | 4.313 10 <sup>-5</sup>                | 2.5  | 0.0031                            | 17.26 ± 0.05           | 17.2 ± 0.1                                   |
|       |                                | 4.497                           | 502.4        |                  |                 |                  |                                       |      |                                   |                        |                                              |
| 2     |                                | 4.041                           | 175.9        | 2.9              | 689.1           | 2.0614           | 4.319 10 <sup>-5</sup>                | 2.5  | 0.0031                            | 17.19 ± 0.05           |                                              |
|       |                                | 4.500                           | 513.2        |                  |                 |                  |                                       |      |                                   |                        |                                              |
| 3     |                                | 4.047                           | 182.7        | 2.9              | 709.0           | 2.0813           | 4.437 10 <sup>-5</sup>                | 2.5  | 0.0031                            | 17.02 ± 0.05           |                                              |
|       |                                |                                 | 4.508        |                  |                 |                  |                                       |      |                                   |                        |                                              |
| 4     | 1 : 2                          | 4.041                           | 147.4        | 3.1              | 605.7           | 2.0675           | 3.825 10 <sup>-5</sup>                | 5    | 0.0062                            | 34.3 ± 0.1             | 34.6 ± 0.3                                   |
|       |                                | 4.500                           | 458.3        |                  |                 |                  |                                       |      |                                   |                        |                                              |
| 5     |                                | 4.038                           | 144.0        | 3.1              | 591.3           | 2.0495           | 3.740 10 <sup>-5</sup>                | 5    | 0.0062                            | 34.6 ± 0.1             |                                              |
|       |                                |                                 | 4.497        |                  |                 |                  |                                       |      |                                   |                        |                                              |
| 6     |                                | 4.037                           | 146.4        | 3.1              | 599.0           | 2.0313           | 3.786 10 <sup>-5</sup>                | 5    | 0.0062                            | 34.9 ± 0.1             |                                              |
|       |                                |                                 | 4.497        |                  |                 |                  |                                       |      |                                   |                        |                                              |
| 7     | 1 : 1                          | 4.029                           | 190.3        | 2.9              | 750.0           | 2.0544           | 4.679 10 <sup>-5</sup>                | 25   | 0.0124                            | 68.8 ± 0.2             | 69 ± 1                                       |
|       |                                | 4.490                           | 559.7        |                  |                 |                  |                                       |      |                                   |                        |                                              |
| 8     |                                | 4.030                           | 173.2        | 2.9              | 675.0           | 2.0854           | 4.236 10 <sup>-5</sup>                | 25   | 0.0124                            | 67.8 ± 0.2             |                                              |
|       |                                |                                 | 4.490        |                  |                 |                  |                                       |      |                                   |                        |                                              |
| 9     |                                | 4.034                           | 224.1        | 3.0              | 904.7           | 1.993            | 5.595 10 <sup>-5</sup>                | 25   | 0.0124                            | 70.9 ± 0.2             |                                              |
|       |                                |                                 | 4.494        |                  |                 |                  |                                       |      |                                   |                        |                                              |
| 10    | 2 : 1                          | 4.035                           | 204.5        | 3.4              | 894.7           | 2.0866           | 5.536 10 <sup>-5</sup>                | 2500 | 0.0248                            | 105.7 ± 0.3            | 106 ± 2                                      |
|       |                                | 4.496                           | 690.2        |                  |                 |                  |                                       |      |                                   |                        |                                              |
| 11    |                                | 4.033                           | 231.5        | 3.4              | 1019.1          | 2.0325           | 6.272 10 <sup>-5</sup>                | 2500 | 0.0248                            | 104.3 ± 0.3            |                                              |
|       |                                |                                 | 4.493        |                  |                 |                  |                                       |      |                                   |                        |                                              |
| 12    |                                | 4.036                           | 221.5        | 3.4              | 976.1           | 1.9911           | 6.017 10 <sup>-5</sup>                | 2500 | 0.0248                            | 108.0 ± 0.3            |                                              |
|       |                                |                                 | 4.497        |                  |                 |                  |                                       |      |                                   |                        |                                              |



|    |       |       |        |     |        |        |                        |      |        |             |         |
|----|-------|-------|--------|-----|--------|--------|------------------------|------|--------|-------------|---------|
| 13 | 4 : 1 | 4.039 | 511.9  | 3.4 | 2249.7 | 2.0605 | 1.355 10 <sup>-4</sup> | 5000 | 0.0496 | 125.0 ± 0.4 | 119 ± 4 |
|    |       | 4.500 | 1737.8 |     |        |        |                        |      |        |             |         |
| 14 |       | 4.035 | 533.4  | 3.4 | 2353.4 | 2.0712 | 1.417 10 <sup>-4</sup> | 5000 | 0.0496 | 117.5 ± 0.4 |         |
|    |       | 4.494 | 1820.2 |     |        |        |                        |      |        |             |         |
| 15 |       | 4.035 | 547.8  | 3.4 | 2415.9 | 2.0349 | 1.454 10 <sup>-4</sup> | 5000 | 0.0496 | 115.4 ± 0.4 |         |
|    |       | 4.496 | 1868.1 |     |        |        |                        |      |        |             |         |

**For all experiments in Table S7 :**

DDA<sub>SM</sub> = 75.0 ± 0.2 (see Table S1)

M<sub>av\_mono</sub> = 171,67 ± 0.08 g/mol (see Table S2)

V<sub>rxn</sub> = 0.04 L

Calibration curve equation: Sum of areas = 1.69 10<sup>7</sup> [GLA<sub>res\_HPLC</sub>] – 40.8 (Correlation coefficient R<sup>2</sup>=1)

**\* Area ratio**

μ = 3.1

σ = 0.2

coefficient of variation (CV) = 0.0788

**Table S8** HPLC analysis and determination of LRHPLC for reticulated derivatives of ChitoClear® HQG 400

| Entry | GLA : NH <sub>2</sub> ratio | Peak retention time (min) | Peak area | Area Ra-<br>tio | Sum of<br>areas | <i>m</i> (sample)<br>(g) | [GLA <sub>res_HPLC</sub> ]<br>(mol/L) | DF  | <i>n</i> (GLA <sub>added</sub> ) (mol) | LR <sub>HPLC</sub> (%) | LR <sub>HPLC</sub> (%)<br>Mean of triplicate |
|-------|-----------------------------|---------------------------|-----------|-----------------|-----------------|--------------------------|---------------------------------------|-----|----------------------------------------|------------------------|----------------------------------------------|
| 1     | 1 : 4                       | 3.977                     | 203.0     | 2.9             | 791.4           | 2.0442                   | 4.839 10 <sup>-5</sup>                | 2.5 | 0.0031                                 | 16.7 ± 0.2             | 16.8 ± 0.3                                   |
|       |                             | 4.422                     | 588.4     |                 |                 |                          |                                       |     |                                        |                        |                                              |
| 2     |                             | 3.983                     | 209.2     | 2.9             | 817.3           | 2.058                    | 4.989 10 <sup>-5</sup>                | 2.5 | 0.0031                                 | 16.6 ± 0.2             |                                              |
|       |                             | 4.429                     | 608.1     |                 |                 |                          |                                       |     |                                        |                        |                                              |
| 3     |                             | 3.986                     | 218.9     | 2.9             | 852.9           | 1.9876                   | 5.195 10 <sup>-5</sup>                | 2.5 | 0.0031                                 | 17.1 ± 0.2             |                                              |
|       |                             | 4.432                     | 634.0     |                 |                 |                          |                                       |     |                                        |                        |                                              |
| 4     | 1 : 2                       | 3.980                     | 213.5     | 3.1             | 953.7           | 2.0009                   | 5.778 10 <sup>-5</sup>                | 5   | 0.0062                                 | 34.0 ± 0.3             | 34.0 ± 0.3                                   |
|       |                             | 4.426                     | 722.2     |                 |                 |                          |                                       |     |                                        |                        |                                              |

|    |       |       |        |     |        |        |                        |      |        |            |         |
|----|-------|-------|--------|-----|--------|--------|------------------------|------|--------|------------|---------|
| 5  |       | 3.984 | 252.8  | 3.1 | 1039.8 | 1.994  | 6.275 10 <sup>-5</sup> | 5    | 0.0062 | 34.2 ± 0.3 |         |
|    |       | 4.431 | 787.0  |     |        |        |                        |      |        |            |         |
| 6  |       | 3.984 | 245.2  | 3.2 | 1022.9 | 2.0188 | 6.177 10 <sup>-5</sup> | 5    | 0.0062 | 33.7 ± 0.3 |         |
|    |       | 4.432 | 777.7  |     |        |        |                        |      |        |            |         |
| 7  | 1 : 1 | 3.980 | 588.9  | 3.3 | 2536.5 | 2.0252 | 1.493 10 <sup>-4</sup> | 25   | 0.0124 | 66.6 ± 0.6 | 66 ± 1  |
|    |       | 4.429 | 1947.6 |     |        |        |                        |      |        |            |         |
| 8  |       | 3.981 | 647.6  | 3.2 | 2716.9 | 2.0074 | 1.597 10 <sup>-4</sup> | 25   | 0.0124 | 67.1 ± 0.6 |         |
|    |       | 4.429 | 2069.3 |     |        |        |                        |      |        |            |         |
| 9  |       | 3.978 | 533.6  | 3.3 | 2271.1 | 2.0636 | 1.339 10 <sup>-4</sup> | 25   | 0.0124 | 65.4 ± 0.6 |         |
|    |       | 4.426 | 1737.5 |     |        |        |                        |      |        |            |         |
| 10 | 2 : 1 | 3.980 | 280.6  | 3.3 | 1215.4 | 2.0663 | 7.290 10 <sup>-5</sup> | 2500 | 0.0248 | 93.3 ± 0.9 | 94 ± 1  |
|    |       | 4.430 | 934.8  |     |        |        |                        |      |        |            |         |
| 11 |       | 3.985 | 274.2  | 3.4 | 1194.2 | 2.0532 | 7.168 10 <sup>-5</sup> | 2500 | 0.0248 | 94.5 ± 0.9 |         |
|    |       | 4.434 | 920.0  |     |        |        |                        |      |        |            |         |
| 12 |       | 3.986 | 295.1  | 3.4 | 1287.3 | 1.9843 | 7.706 10 <sup>-5</sup> | 2500 | 0.0248 | 94.8 ± 0.9 |         |
|    |       | 4.435 | 992.2  |     |        |        |                        |      |        |            |         |
| 13 | 4 : 1 | 3.987 | 578,8  | 3.2 | 2413,0 | 2.0146 | 1.421 10 <sup>-4</sup> | 5000 | 0.0496 | 116 ± 1    | 116 ± 3 |
|    |       | 4.437 | 1834.2 |     |        |        |                        |      |        |            |         |
| 14 |       | 3.992 | 557.9  | 3.2 | 2317,1 | 2.0548 | 1.370 10 <sup>-4</sup> | 5000 | 0.0496 | 119 ± 1    |         |
|    |       | 4.443 | 1759.2 |     |        |        |                        |      |        |            |         |
| 15 |       | 3.996 | 581.2  | 3.2 | 2453,9 | 2.0260 | 1.44510 <sup>-4</sup>  | 5000 | 0.0496 | 112 ± 1    |         |
|    |       | 4.447 | 1872.7 |     |        |        |                        |      |        |            |         |

**For all experiments in Table S8 :**

$DDA_{SM} = 77.5 \pm 0.6$  (see Table S1)

$M_{av\_mono} = 170,6 \pm 0.3$  g/mol (see Table S2)

$V_{rxn} = 0.04$  L

Calibration curve equation: Sum of areas =  $1.73 \cdot 10^7$  [GLA<sub>res\_HPLC</sub>] – 45.8 (Correlation coefficient  $R^2 = 1$ )

**\* Area ratio**

$\mu = 3.2$

$\sigma = 0.1$

coefficient of variation (CV) = 0.0545

**Table S9** HPLC analysis and determination of LRHPLC for reticulated derivatives of ChitoClear® HQG 800

| Entry | GLA/NH <sub>2</sub> ratio | Peak retention time (min) | Peak area | Area Ratio | Sum of areas | <i>m</i> (sample) (g) | [GLA <sub>res_HPLC</sub> ] (mol/L) | DF   | <i>n</i> (GLA <sub>added</sub> ) (mol) | LR <sub>HPLC</sub> (%) | LR <sub>HPLC</sub> (%)<br>Mean of triplicate |
|-------|---------------------------|---------------------------|-----------|------------|--------------|-----------------------|------------------------------------|------|----------------------------------------|------------------------|----------------------------------------------|
| 1     | 1 : 4                     | 3.998                     | 207.7     | 2.8        | 788.6        | 2.039                 | 4.894 10 <sup>-5</sup>             | 2.5  | 0.0031                                 | 19.03 ± 0.03           | 18.9 ± 0.3                                   |
|       |                           | 4.447                     | 580.9     |            |              |                       |                                    |      |                                        |                        |                                              |
| 2     |                           | 3.997                     | 189.3     | 2.8        | 717.2        | 2.0918                | 4.474 10 <sup>-5</sup>             | 2.5  | 0.0031                                 | 18.55 ± 0.03           |                                              |
|       |                           | 4.446                     | 527.9     |            |              |                       |                                    |      |                                        |                        |                                              |
| 3     |                           | 3.999                     | 202.1     | 2.8        | 761.2        | 2.0192                | 4.733 10 <sup>-5</sup>             | 2.5  | 0.0031                                 | 19.22 ± 0.03           |                                              |
|       |                           | 4.449                     | 559.1     |            |              |                       |                                    |      |                                        |                        |                                              |
| 4     | 1 : 2                     | 3.994                     | 170.4     | 3.0        | 685.9        | 2.0188                | 4.290 10 <sup>-4</sup>             | 5    | 0.0062                                 | 38.45 ± 0.06           | 38.4 ± 0.2                                   |
|       |                           | 4.444                     | 515.5     |            |              |                       |                                    |      |                                        |                        |                                              |
| 5     |                           | 3.992                     | 168.5     | 3.0        | 670.5        | 2.0323                | 4.199 10 <sup>-5</sup>             | 5    | 0.0062                                 | 38.19 ± 0.06           |                                              |
|       |                           | 4.443                     | 502.0     |            |              |                       |                                    |      |                                        |                        |                                              |
| 6     |                           | 4.001                     | 165.1     | 3.0        | 665.3        | 2.0055                | 4.169 10 <sup>-5</sup>             | 5    | 0.0062                                 | 38.71 ± 0.06           |                                              |
|       |                           | 4.453                     | 500.2     |            |              |                       |                                    |      |                                        |                        |                                              |
| 7     | 1 : 1                     | 3.995                     | 210.0     | 3.0        | 804.4        | 2.0897                | 4.987 10 <sup>-5</sup>             | 25   | 0.0124                                 | 74.1 ± 0.1             | 76 ± 1                                       |
|       |                           | 4.451                     | 594.4     |            |              |                       |                                    |      |                                        |                        |                                              |
| 8     |                           | 3.994                     | 271.1     | 3.0        | 1071.5       | 2.0029                | 6.558 10 <sup>-5</sup>             | 25   | 0.0124                                 | 77.2 ± 0.1             |                                              |
|       |                           | 4.446                     | 800.4     |            |              |                       |                                    |      |                                        |                        |                                              |
| 9     |                           | 3.996                     | 246.6     | 3.1        | 999.4        | 2.0203                | 6.134 10 <sup>-5</sup>             | 25   | 0.0124                                 | 76.6 ± 0.1             |                                              |
|       |                           | 4.448                     | 752.8     |            |              |                       |                                    |      |                                        |                        |                                              |
| 10    | 2 : 1                     | 3.996                     | 216.4     | 3.3        | 933.5        | 2.0089                | 5.746 10 <sup>-5</sup>             | 2500 | 0.0248                                 | 118.9 ± 0.2            | 118.4 ± 0.4                                  |
|       |                           | 4.448                     | 717.1     |            |              |                       |                                    |      |                                        |                        |                                              |
| 11    |                           | 3.999                     | 229.9     | 3.3        | 993.3        | 1.982                 | 6.098 10 <sup>-5</sup>             | 2500 | 0.0248                                 | 118.3 ± 0.2            |                                              |
|       |                           | 4.451                     | 763.4     |            |              |                       |                                    |      |                                        |                        |                                              |
| 12    |                           | 4.002                     | 201.8     | 3.3        | 873.7        | 2.0602                | 5.395 10 <sup>-5</sup>             | 2500 | 0.0248                                 | 118.09 ± 0.2           |                                              |
|       |                           | 4.456                     | 671.9     |            |              |                       |                                    |      |                                        |                        |                                              |

|    |       |       |        |     |        |        |                        |      |        |             |         |
|----|-------|-------|--------|-----|--------|--------|------------------------|------|--------|-------------|---------|
| 13 | 4 : 1 | 4.000 | 561.9  | 3.6 | 2447.6 | 2.0806 | 1.465 10 <sup>-4</sup> | 5000 | 0.0496 | 122.3 ± 0.2 | 121 ± 2 |
|    |       | 4.452 | 1885.7 |     |        |        |                        |      |        |             |         |
| 14 |       | 4.002 | 568.6  | 3.4 | 2479.0 | 2.0421 | 1.484 10 <sup>-4</sup> | 5000 | 0.0496 | 122.3 ± 0.2 |         |
|    |       | 4.455 | 1910.4 |     |        |        |                        |      |        |             |         |
| 15 |       | 4.003 | 592.8  | 3.4 | 2585.2 | 1.9882 | 1.546 10 <sup>-4</sup> | 5000 | 0.0496 | 117.8 ± 0.2 |         |
|    |       | 4.455 | 1992.4 |     |        |        |                        |      |        |             |         |

**For all experiments in Table S9 :**

$DDA_{SM} = 69.4 \pm 0.1$  (see Table S1)

$M_{av\_mono} = 174,02 \pm 0.04$  g/mol (see Table S2)

$V_{rxn} = 0.04$  L

Calibration curve equation: Sum of areas =  $1.70 \cdot 10^7$  [GLA<sub>res\_HPLC</sub>] - 43.4 (Correlation coefficient  $R^2 = 1$ )

**\* Area ratio**

$\mu = 3.1$

$\sigma = 0.2$

coefficient of variation (CV) = 0.0796

d. Example of chromatogram

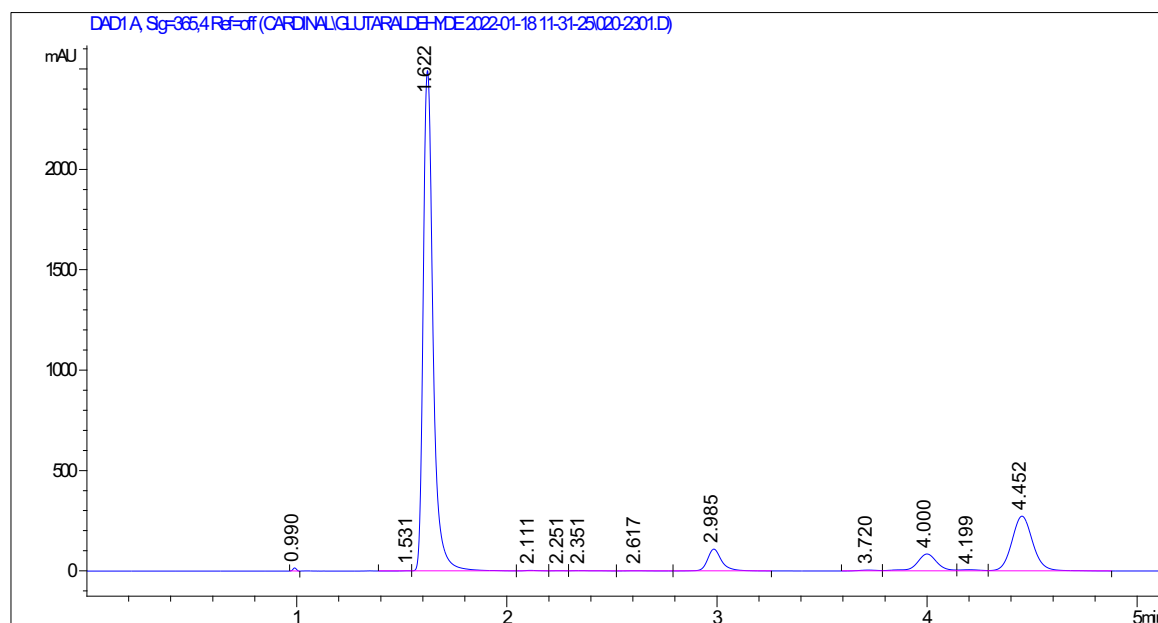

**Figure S5.** Chromatogram of the reaction medium (treated with DNPH) for the reticulation of ChitoClear® HQG 800 / GLA/NH<sub>2</sub> 1:4 (Table S9, Entry 13). Peaks at 4.000 min and 4.452 min correspond to GLA(DNPH)<sub>2</sub>. Peak at 1.622 min is attributed to unreacted excess DNPH. Peak at 2.985 min corresponds to an impurity that was found in the DNPH reagent. Total run time = 5 min.

## 5. FTIR spectra of chitosan resins

FTIR spectra of the three series of chitosan resins (the starting materials and all the reticulated derivatives) are shown in Figures S6–S8. In all cases, three bands were used to confirm the formation of the imide functionalities between glutaraldehyde and chitosan, accordingly to previous studies (refs. 31–32 of the main manuscript). The first band around  $2940\text{ cm}^{-1}$  is attributed to the CH stretching vibration in the methylene groups. The second band around  $1560\text{ cm}^{-1}$  is associated with ethylenic vibration. In both cases, those two bands become more defined and intense as the level of reticulation (along with the number of glutaraldehyde unit incorporated in the structure) increases. The third band around  $1655\text{ cm}^{-1}$  is attributed to the C=N bond of the imine functionality. It is a bit more challenging to observe because unmodified chitosan shows a strong peak around  $1645\text{ cm}^{-1}$  associated with the residual N-acetyl groups (C=O stretching of amide I). However, for our three series of reticulated chitosan, we observed that the maxima of the peak in this region of the spectra was drifting towards the higher frequencies as the level of reticulation increases, suggesting that the imine functionality makes a larger contribution.

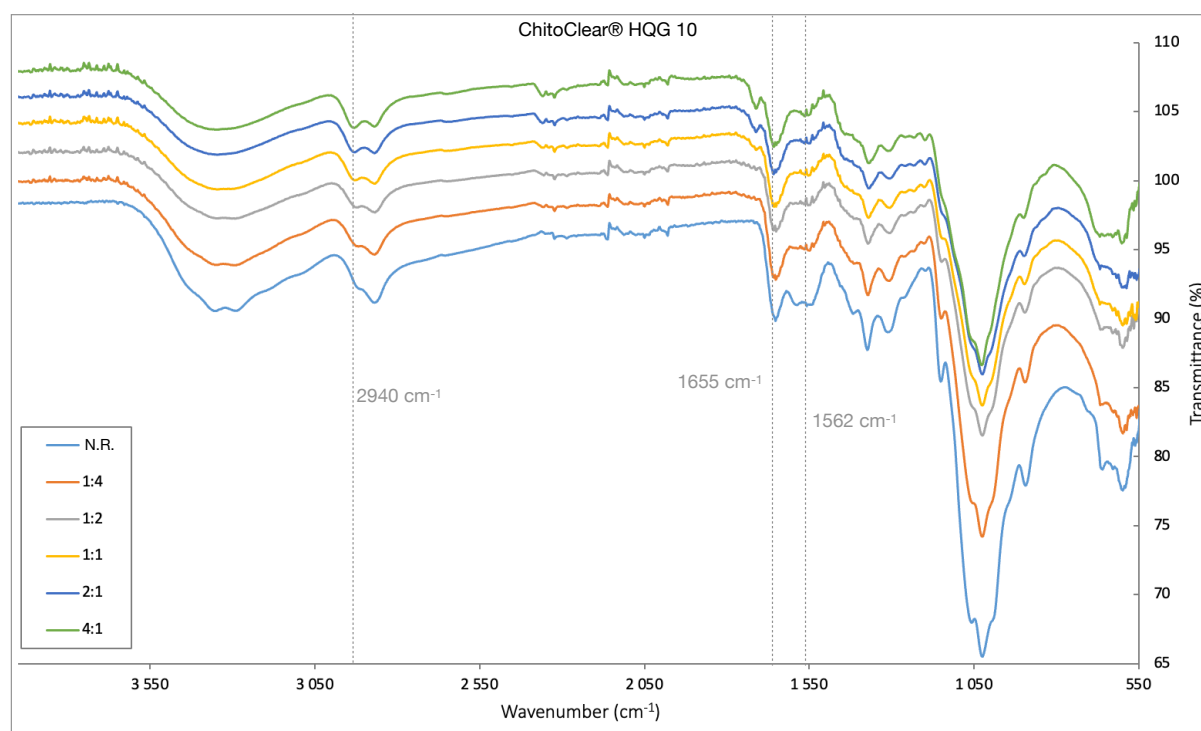

**Figure S6.** FTIR spectra of ChitoClear® HQG 10 before reticulation (N.R. = non reticulated; pale blue trace; bottom trace) and after reticulation with various GLA/NH<sub>2</sub> ratios (1:4, 1:2, 1:1, 2:1 and 4:1; 2<sup>nd</sup> to 6<sup>th</sup> traces from bottom).

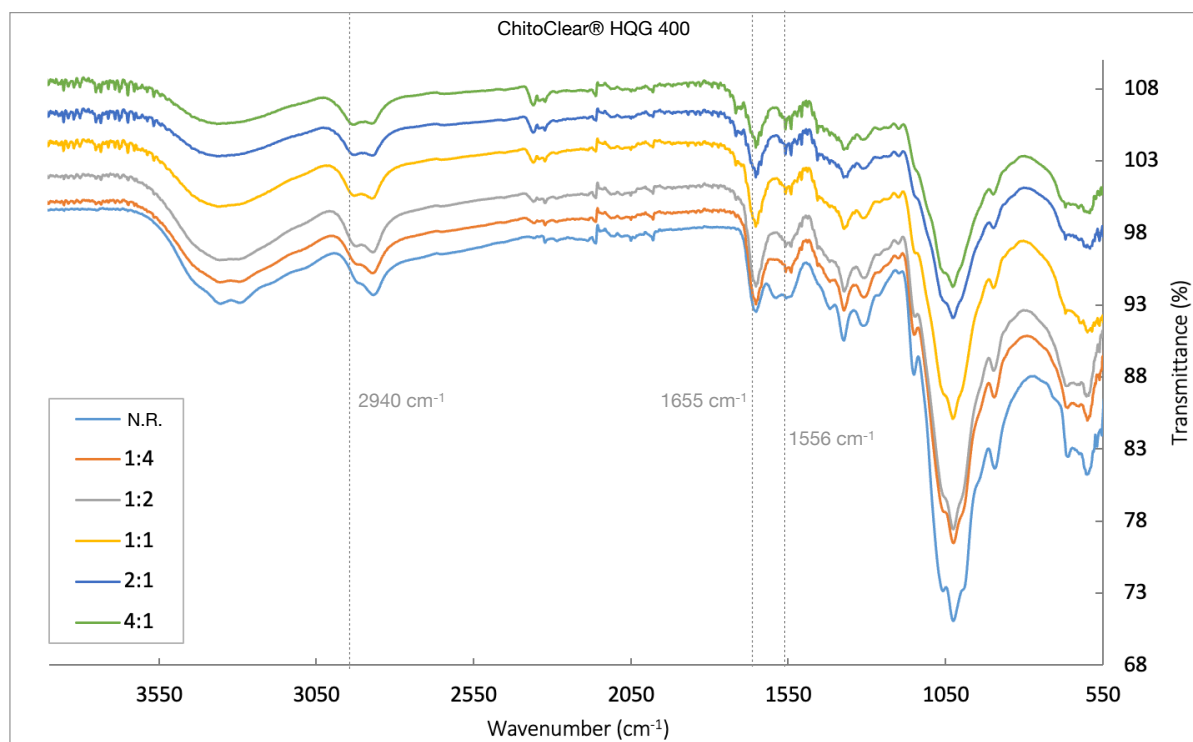

**Figure S7.** FTIR spectra of ChitoClear® HQG 400 before reticulation (N.R. = non reticulated; pale blue trace; bottom trace) and after reticulation with various GLA/ $\text{NH}_2$  ratios (1:4, 1:2, 1:1, 2:1 and 4:1; 2<sup>nd</sup> to 6<sup>th</sup> traces from bottom).

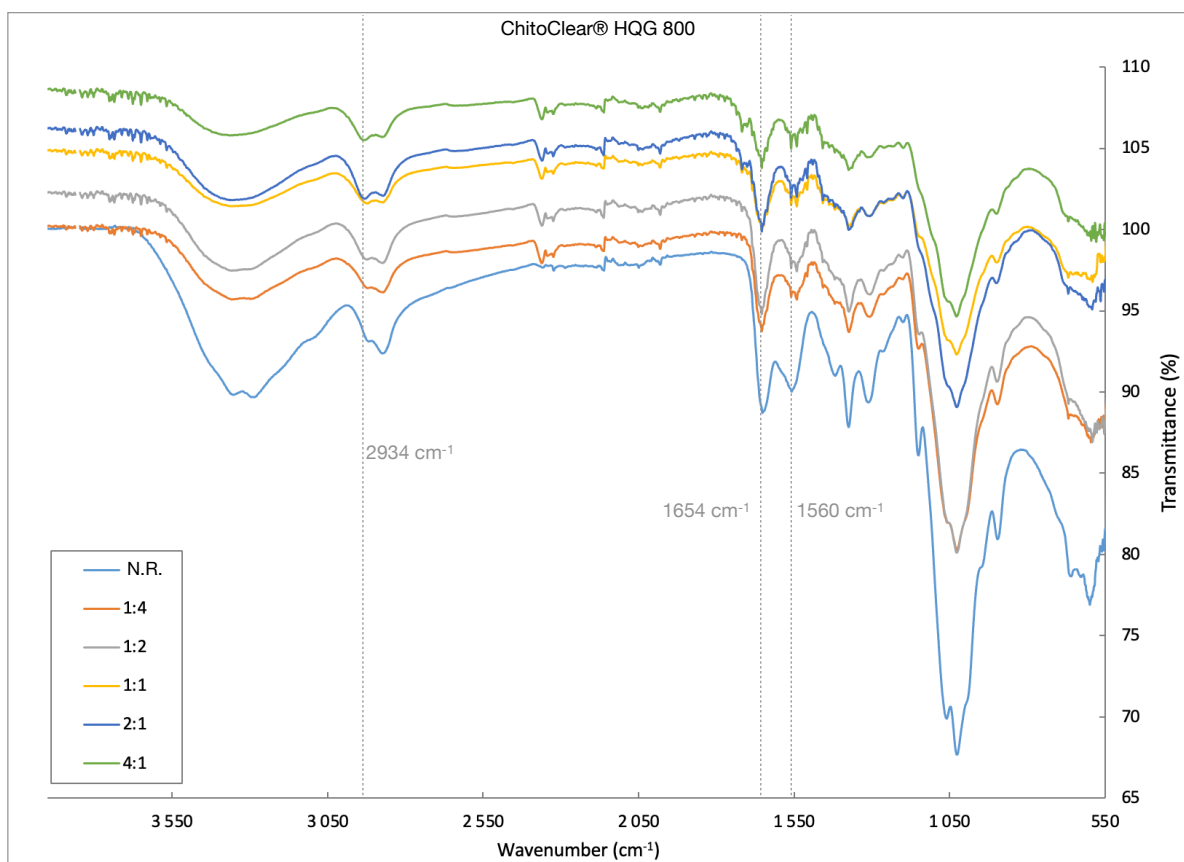

**Figure S8.** FTIR spectra of ChitoClear® HQG 800 before reticulation (N.R. = non reticulated; pale blue trace; bottom trace) and after reticulation with various GLA/ $\text{NH}_2$  ratios (1:4, 1:2, 1:1, 2:1 and 4:1; 2<sup>nd</sup> to 6<sup>th</sup> traces from bottom).
